# Supplementary material for: A sandwich-type ECL immunosensor for the sensitive determination of CEA content based on red emission carbon quantum dots as luminophores
Source: Royal Society of Chemistry journal article supplement (doi:10.1039/d1nj01002f), 2021-01-01
Supplement: d1nj01002f1.pdf [file d1nj01002f1.pdf]

## Electronic Supplementary Material (ESI) for New Journal of Chemistry

### Electronic Supporting Information (ESI)

#### A sandwich-type ECL immunosensor for sensitive determination of CEA content based on red emission carbon quantum dots as luminophores

Yuefang Hu<sup>a,§</sup>, Yuxin Chen<sup>b,§</sup>, Quan Tang<sup>\*a</sup>, Hanfu Liu<sup>\*c</sup>

<sup>a</sup> College of Materials and Chemical engineering, Hezhou University, Hezhou, Guangxi, 542899, China

<sup>b</sup> Faculty of Chinese Medicine Science, Guangxi University of Chinese Medicine, Nanning, Guangxi, 530000, China

<sup>c</sup> College of Pharmacy, Guilin Medical University, Guilin, Guangxi, 541004, China

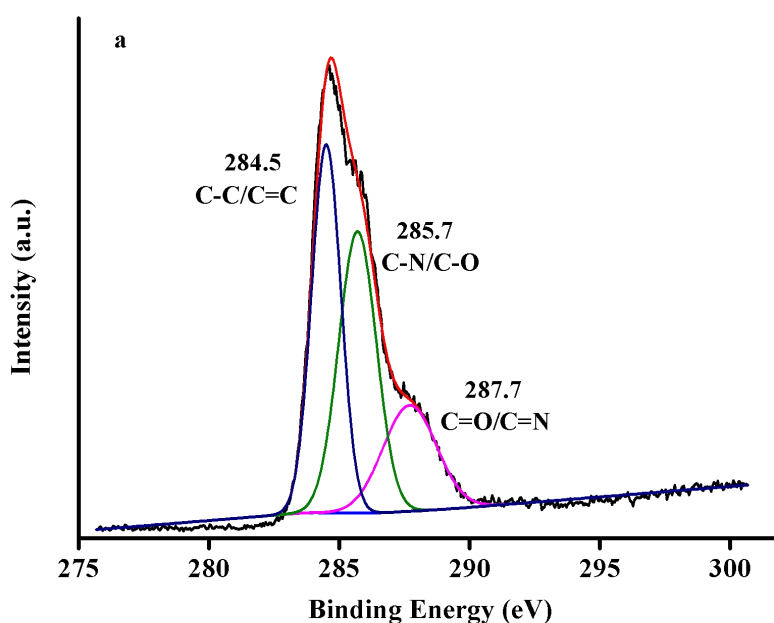

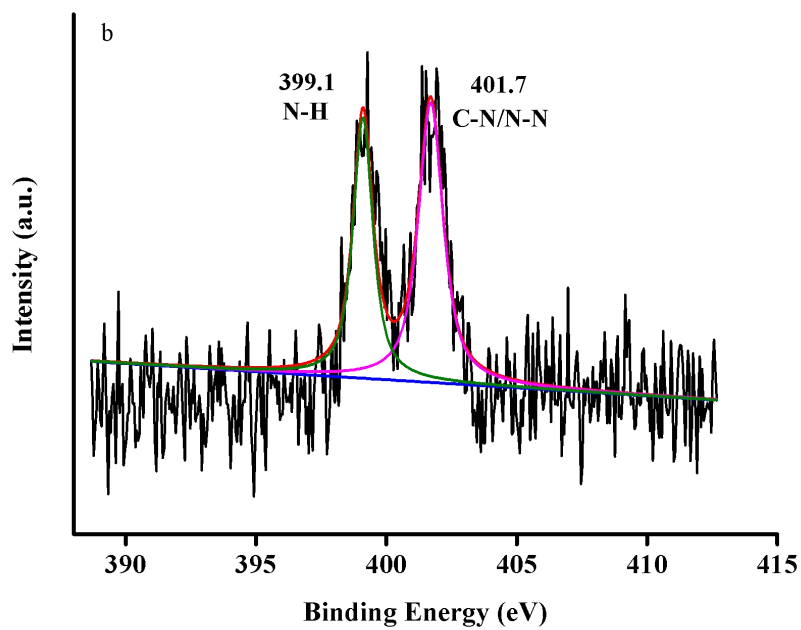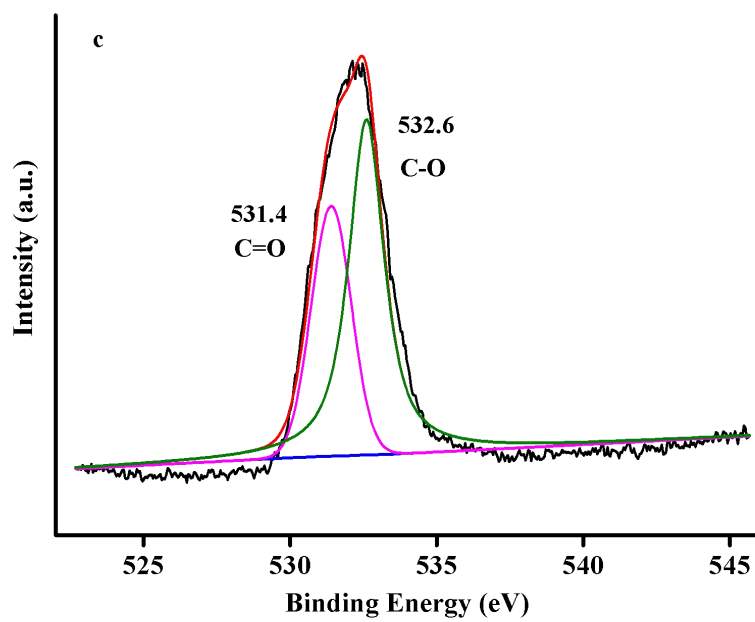

**Fig. S1.** The high-resolved XPS spectrum of C 1s (a), N 1s (b), O 1s (c) peak

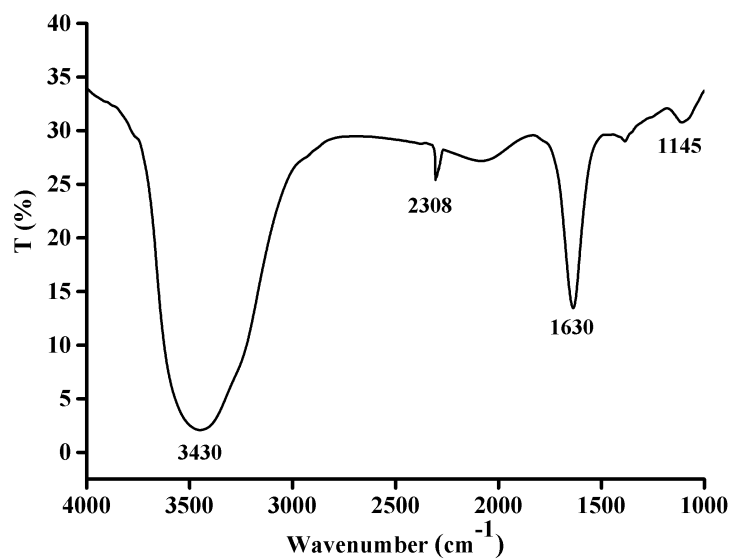

**Fig. S2.** The FT-IR spectrum of NH<sub>2</sub>-G

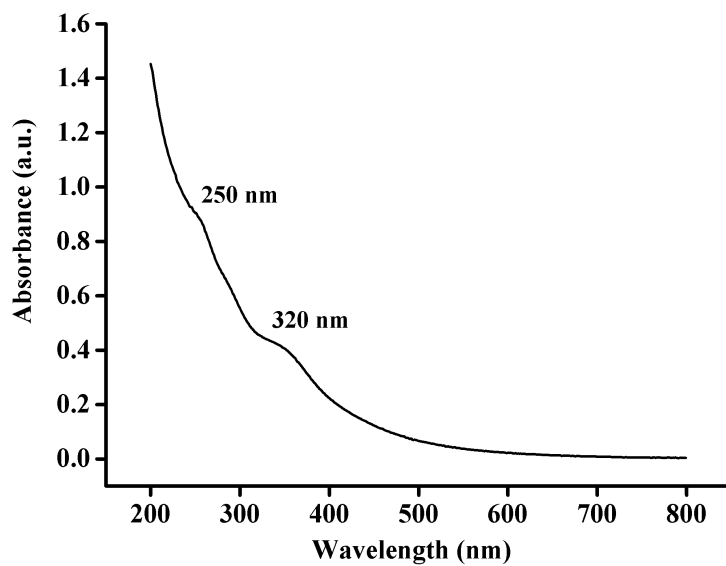

**Fig. S3.** The UV-vis spectrum of NH<sub>2</sub>-G

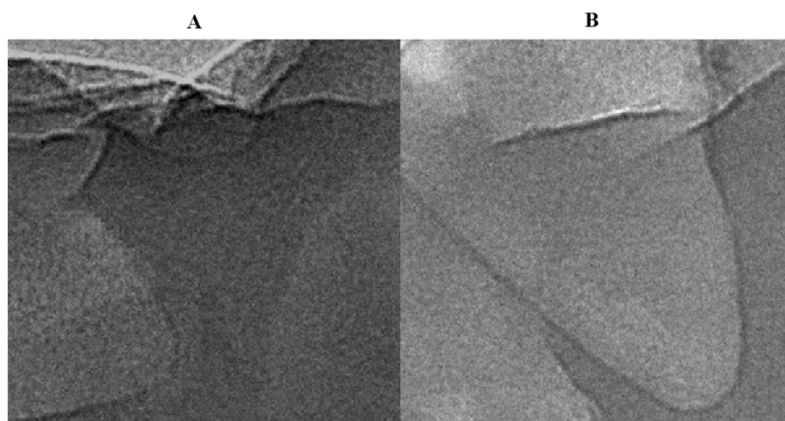

**Fig. S4.** The TEM and SEM images of NH<sub>2</sub>-G.

**Table S1** The atomic percent information of the RCQDs.

| Elements | Atomic % | Start BE | Peak BE | End BE | Height CPS |
|----------|----------|----------|---------|--------|------------|
| C1s      | 66.42    | 296.7    | 284.78  | 280.15 | 8423.69    |
| N1s      | 2.69     | 408.7    | 399.15  | 394.7  | 530.4      |
| O1s      | 30.89    | 540.7    | 532.12  | 526.7  | 10771.87   |

**Table S2** Human serum sample analysis using the proposed method and the ELISA method.

| Sample | This method (ng/mL) | ELISA (ng/mL) | Relative error (%) |
|--------|---------------------|---------------|--------------------|
| 1      | 3.25                | 3.37          | -1.7               |
| 2      | 6.50                | 6.55          | -2.0               |
| 3      | 13.00               | 13.22         | 2.5                |
